# Supplementary material for: Novel Substituted Heteroaromatic Piperazine and Piperidine Derivatives as Inhibitors of Human Enterovirus 71 and Coxsackievirus A16
Source: MDPI journal article supplement (doi:10.3390/molecules18055059), 2013-04-29

## Supplementary Materials

The  $^1\text{H}$ -NMR spectra were measured using a multinuclear Fourier transform (FT)-NMR spectrometer ARX400 (Bruker); Chemical shift are referenced to internal SiMe<sub>4</sub>.

**Figure S1.** The  $^1\text{H}$ -NMR spectrum of compound **8a** in  $\text{CDCl}_3$ .

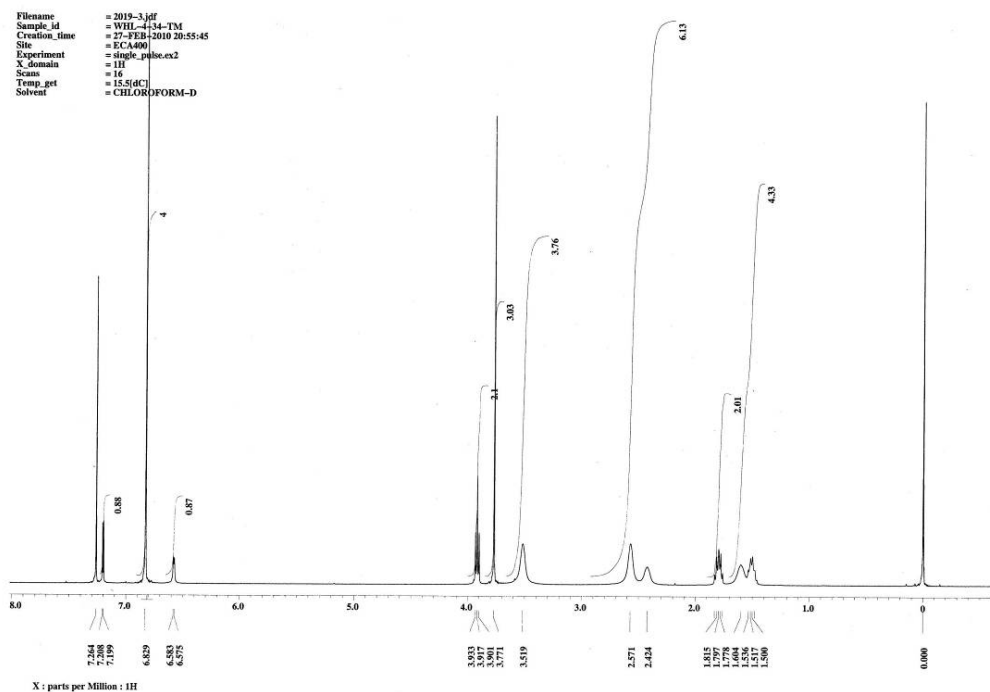

**Figure S2.** The  $^{13}\text{C}$ -NMR spectrum of compound **8a** in DMSO.

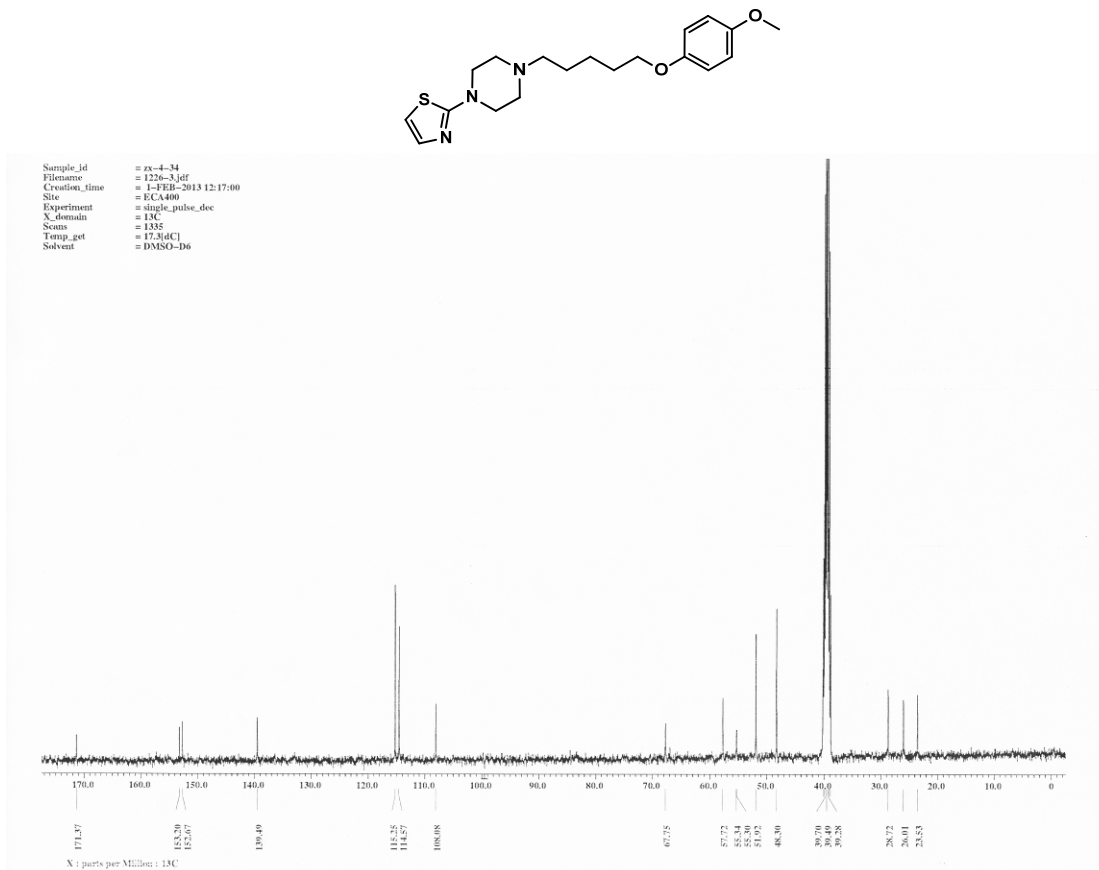

**Figure S3.** The ESI-HRMS of compound **8a**.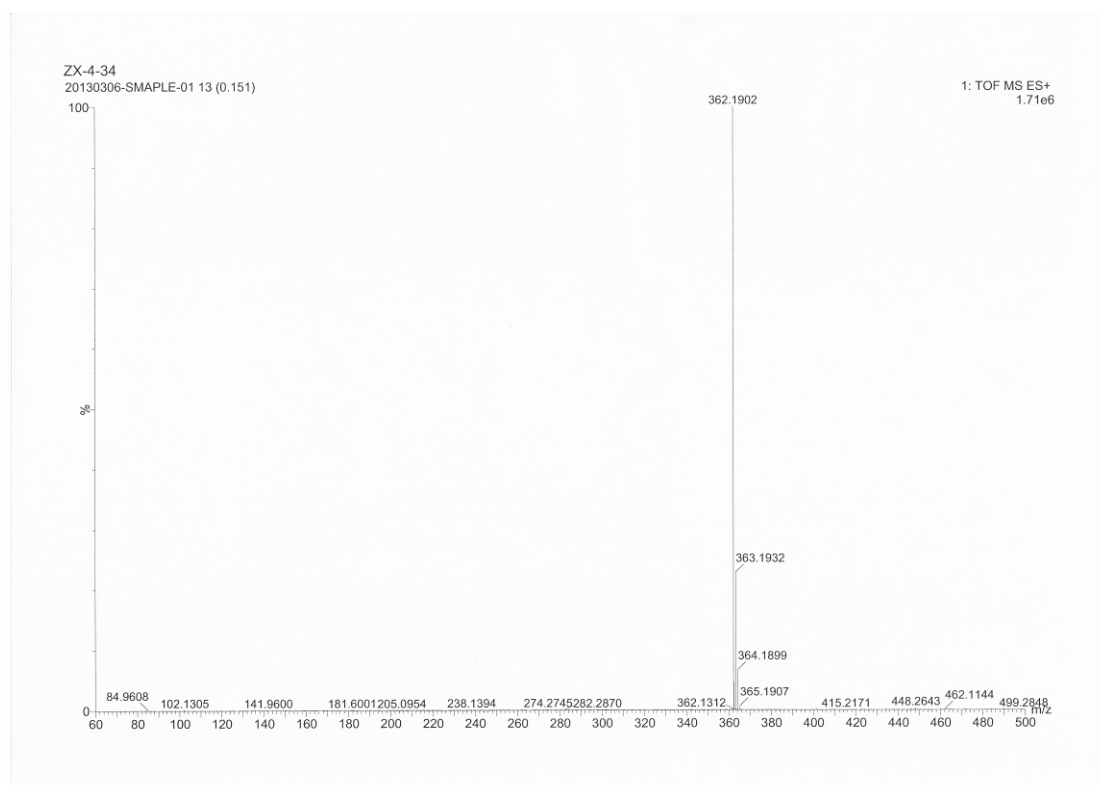**Figure S4.** The  $^1\text{H}$ -NMR spectrum of compound **8b** in  $\text{CDCl}_3$ .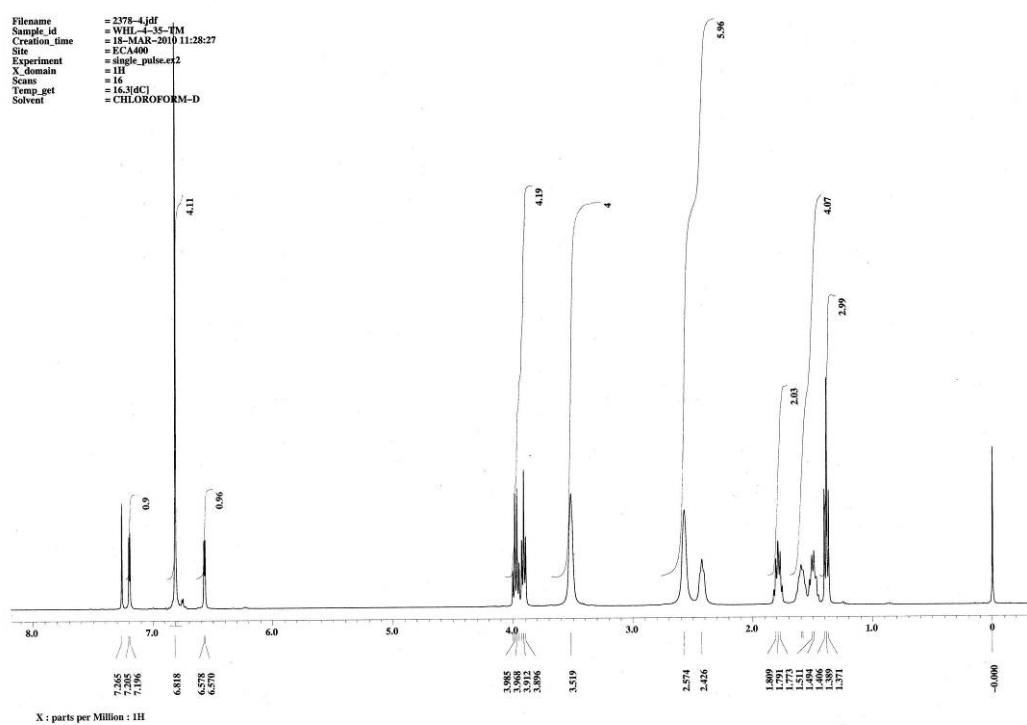

**Figure S5.** The  $^{13}\text{C}$ -NMR spectrum of compound **8b** in DMSO.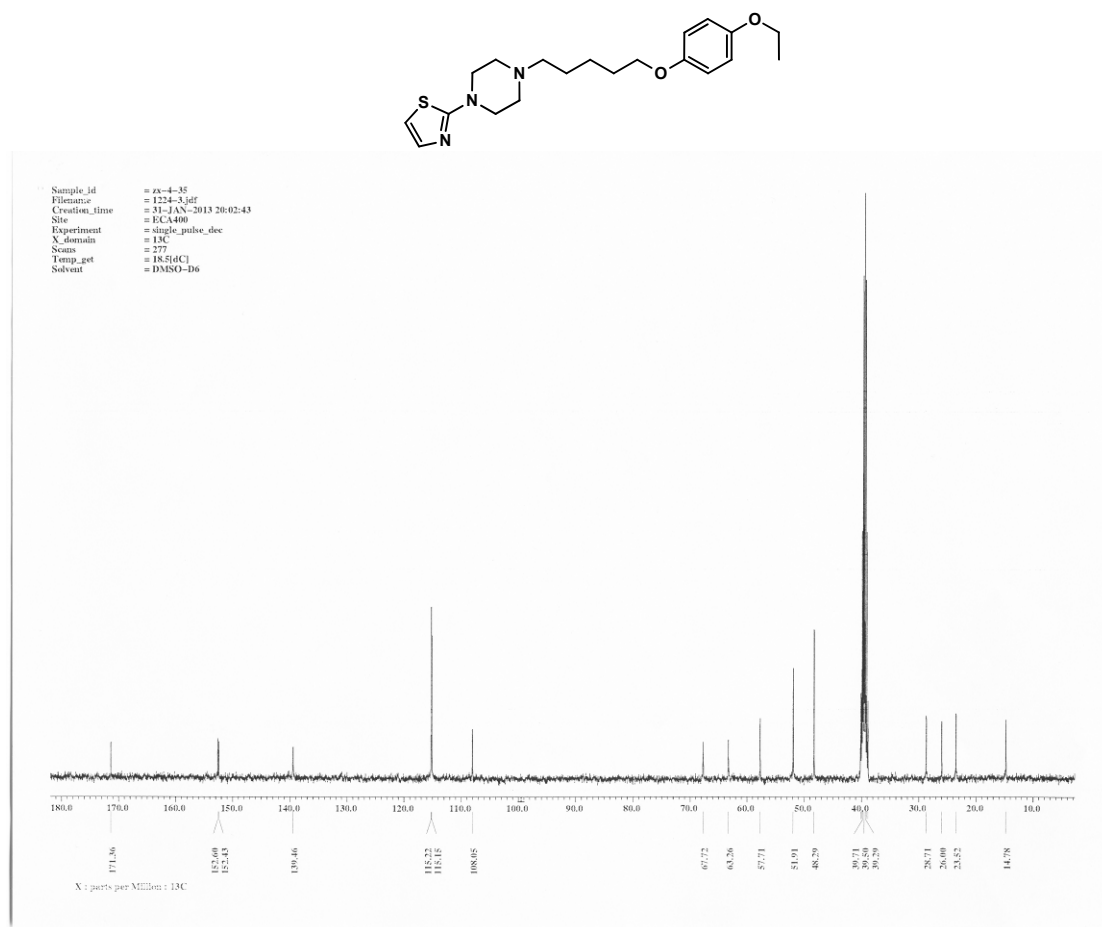**Figure S6.** The ESI-HRMS of compound **8b**.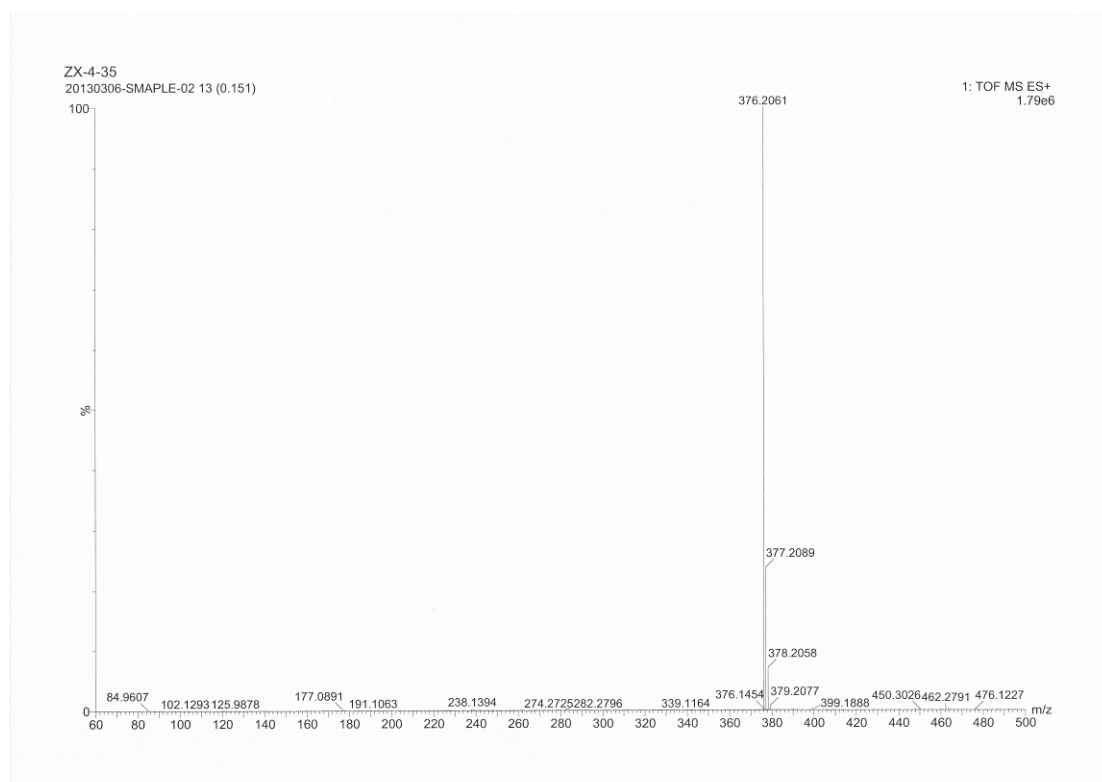

Figure S7. The  $^1\text{H}$ -NMR spectrum of compound **8c** in DMSO.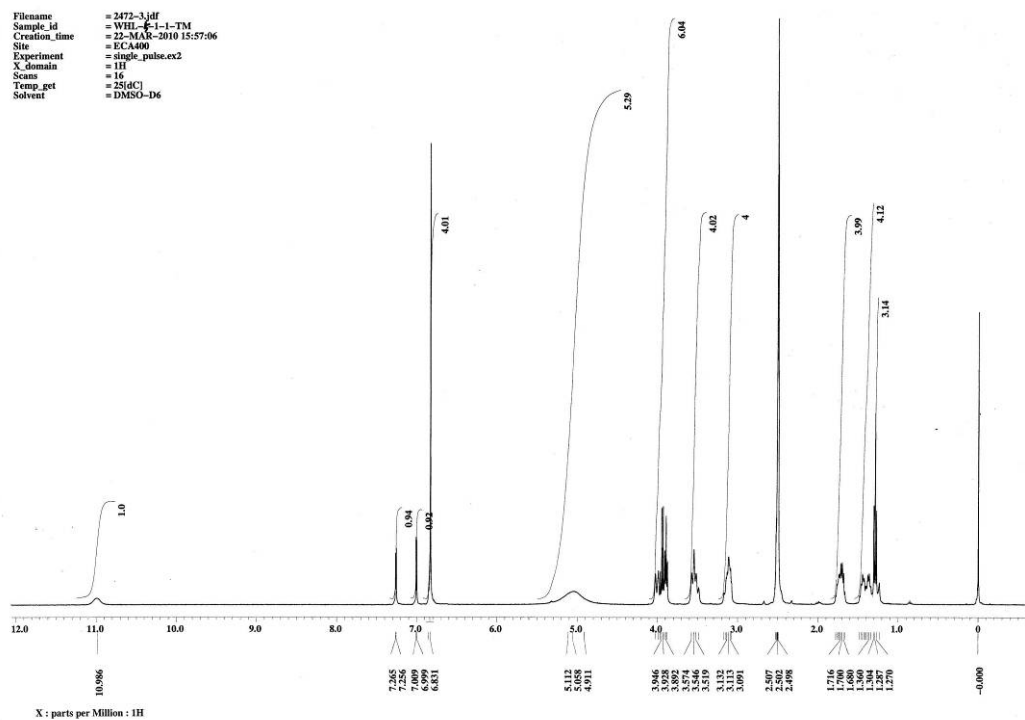Figure S8. The  $^{13}\text{C}$ -NMR spectrum of compound **8c** in DMSO.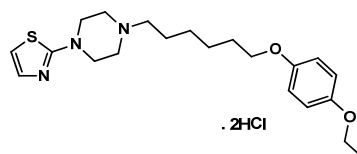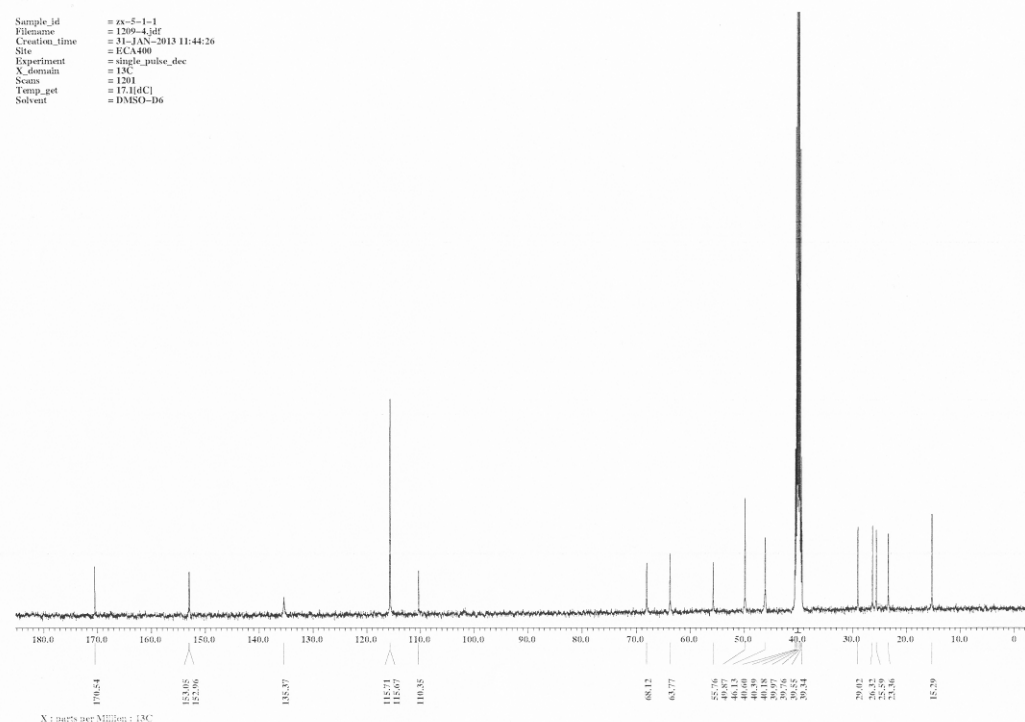

**Figure S9.** The ESI-HRMS of compound **8c**.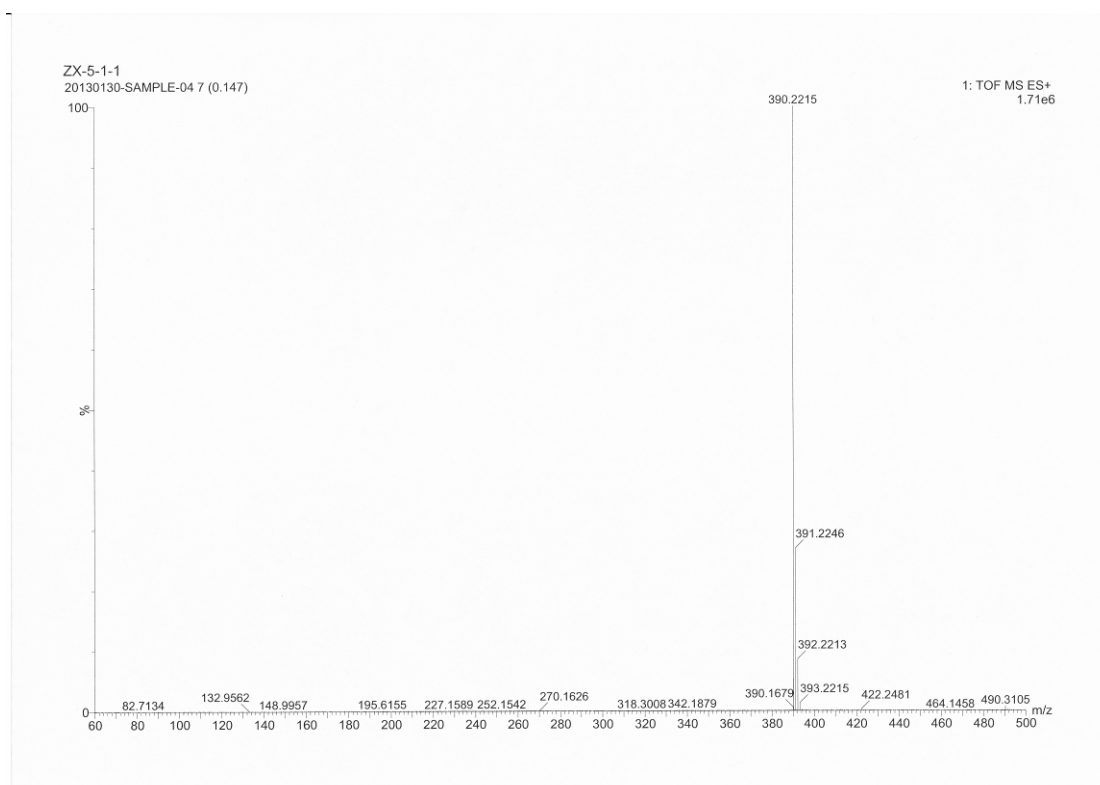**Figure S10.** The  $^1\text{H}$ -NMR spectrum of compound **8d** in DMSO.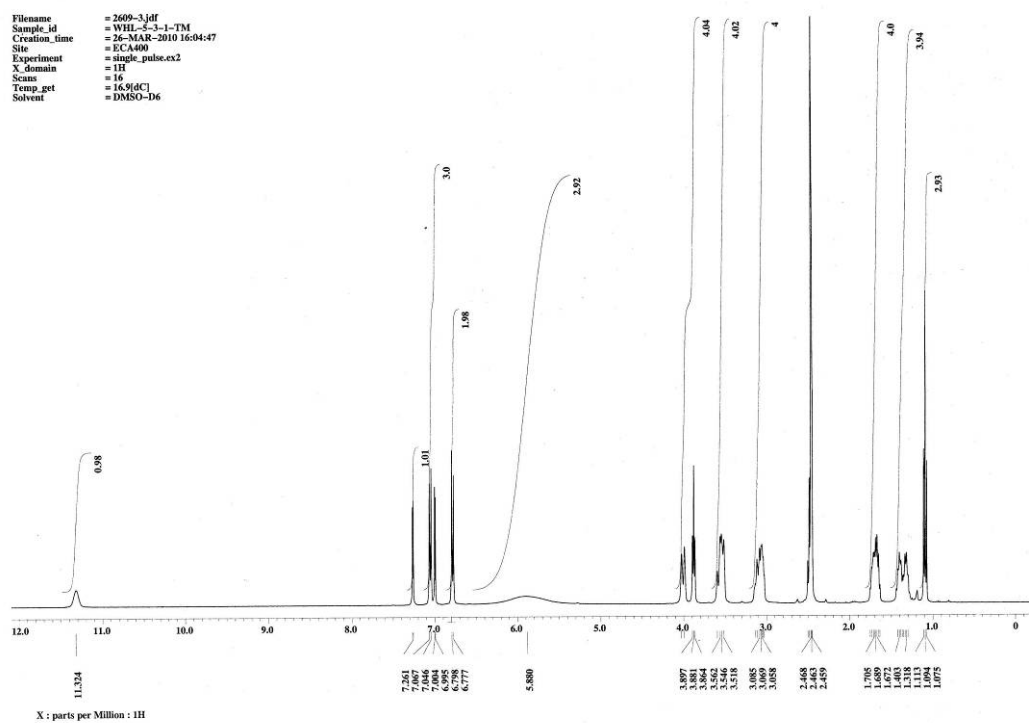

**Figure S11.** The  $^{13}\text{C}$ -NMR spectrum of compound **8d** in DMSO.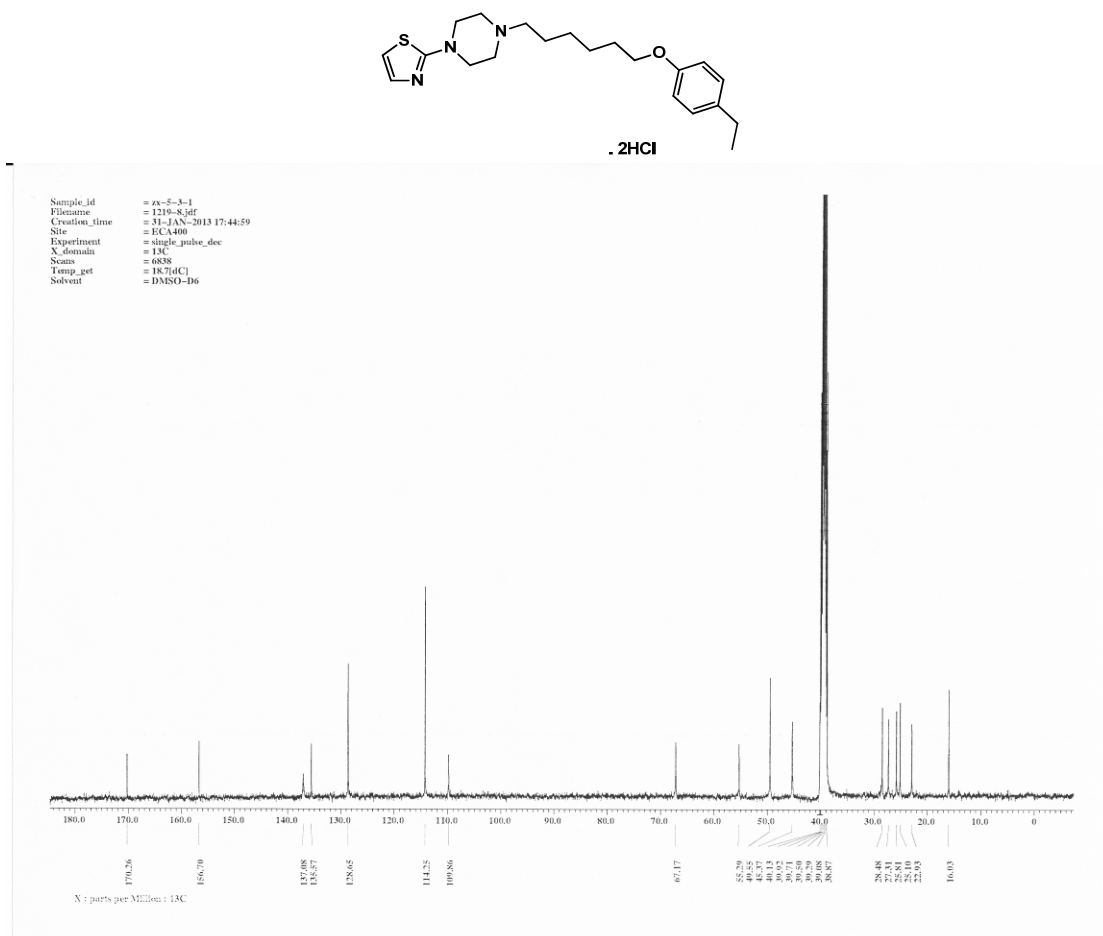**Figure S12.** The ESI-HRMS of compound **8d**.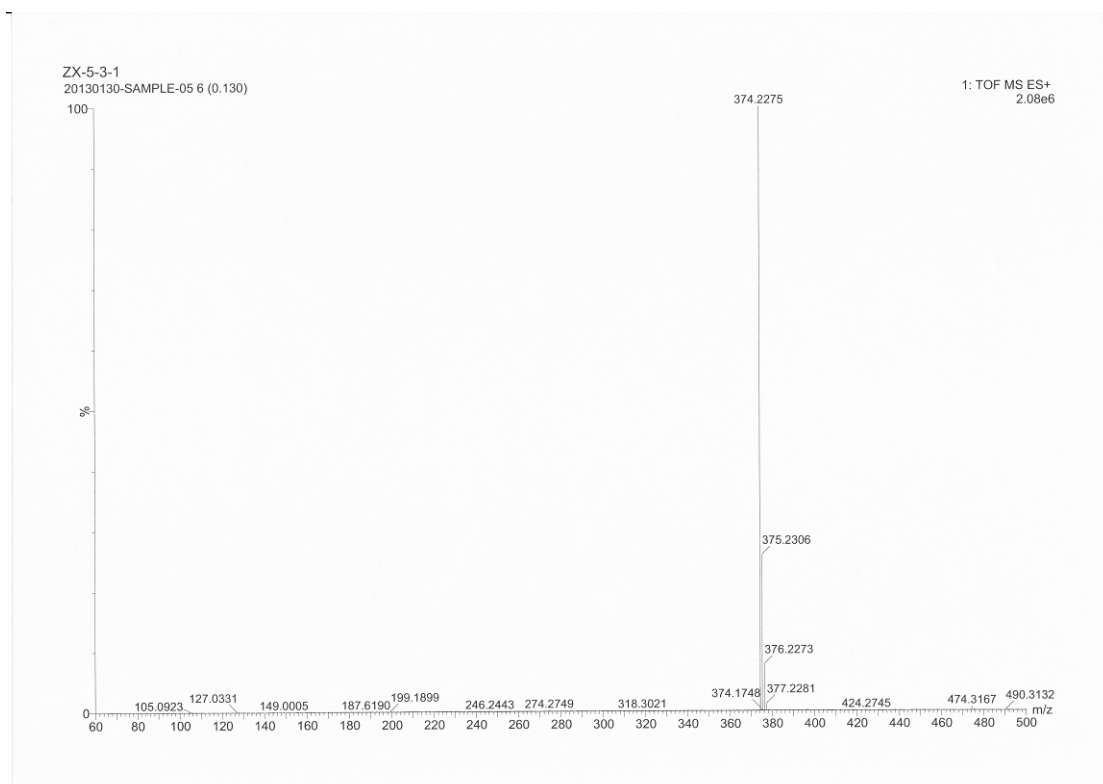

**Figure S13.** The  $^1\text{H}$ -NMR spectrum of compound **8e** in DMSO.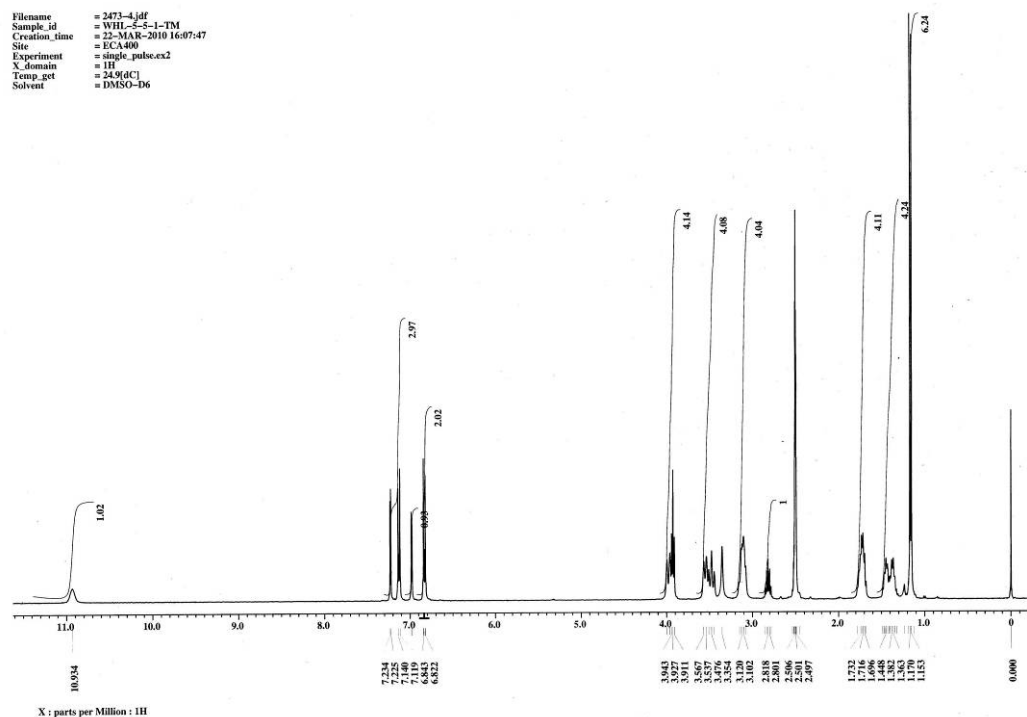**Figure S14.** The  $^{13}\text{C}$ -NMR spectrum of compound **8e** in DMSO.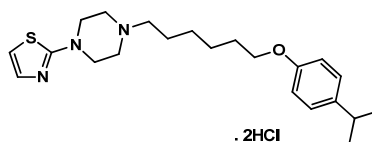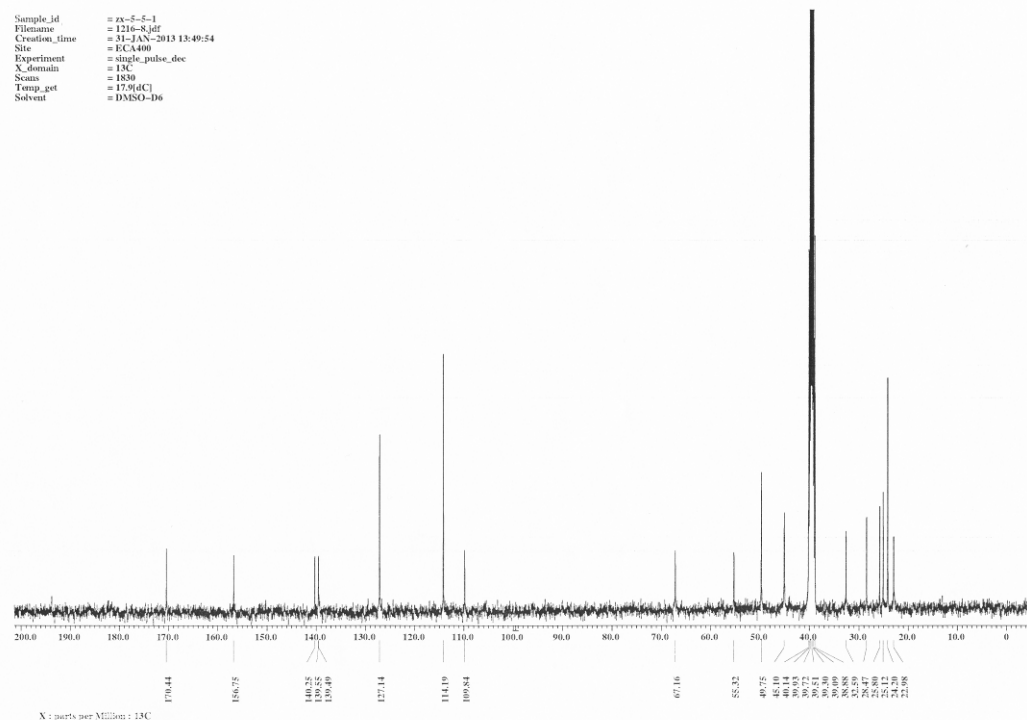

**Figure S15.** The ESI-HRMS of compound **8e**.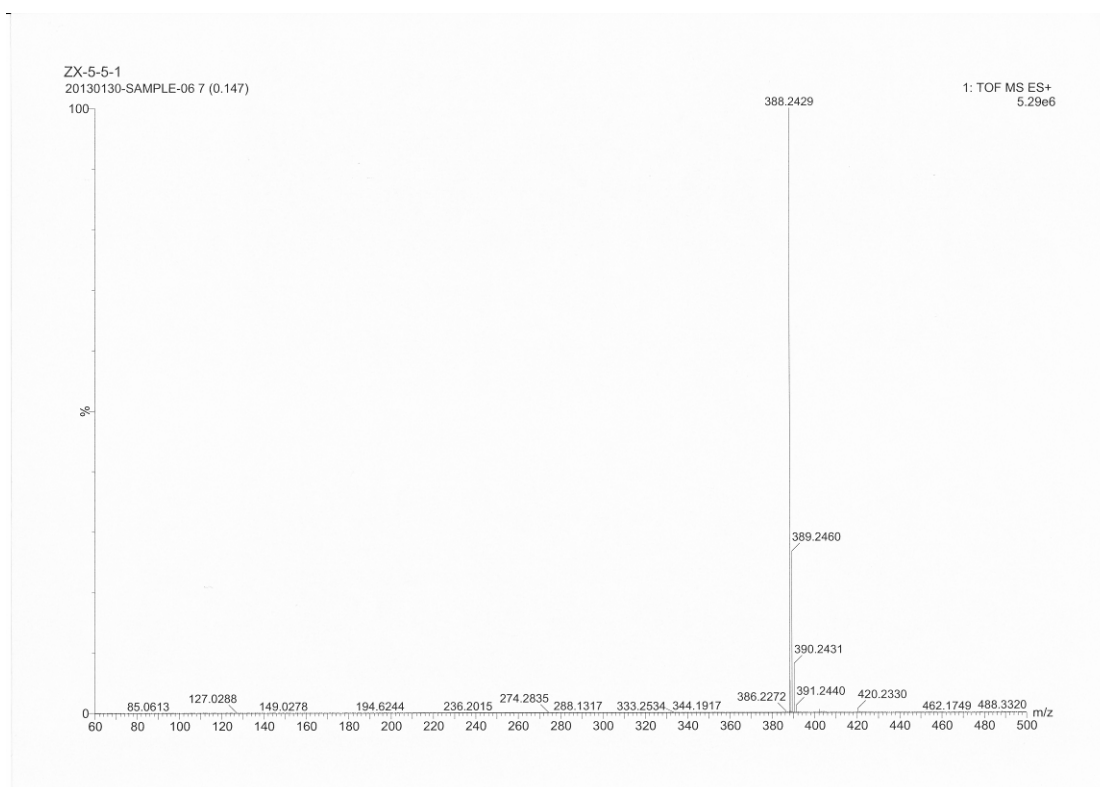**Figure S16.** The  $^1\text{H}$ -NMR spectrum of compound **8f** in  $\text{CDCl}_3$ .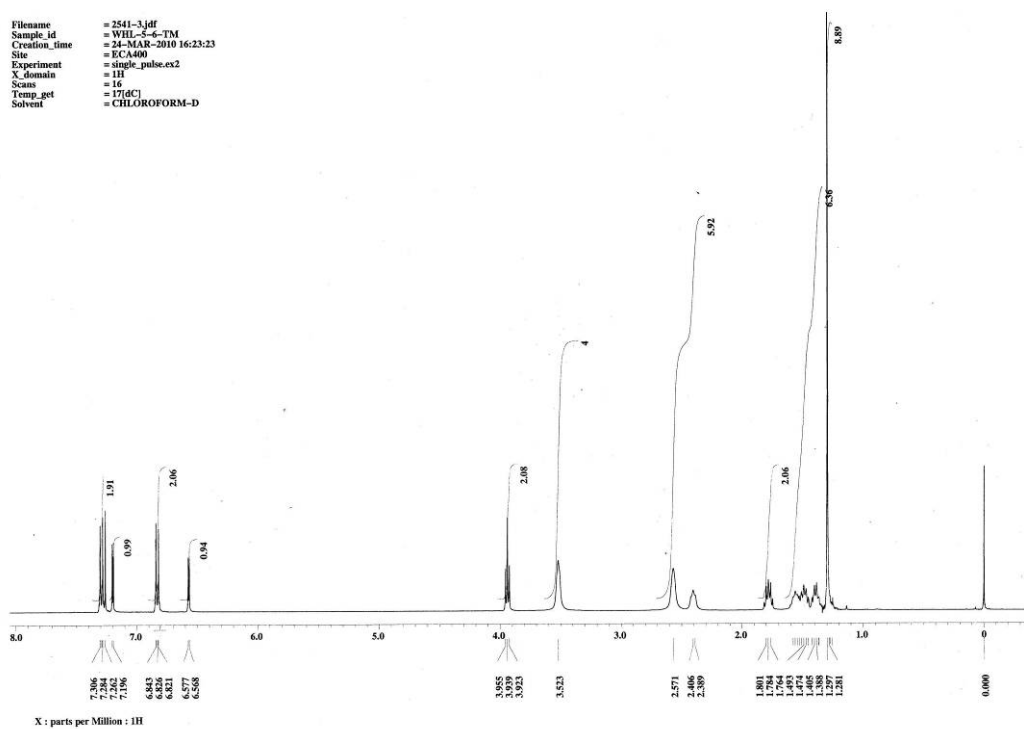

**Figure S17.** The  $^{13}\text{C}$ -NMR spectrum of compound **8f** in DMSO.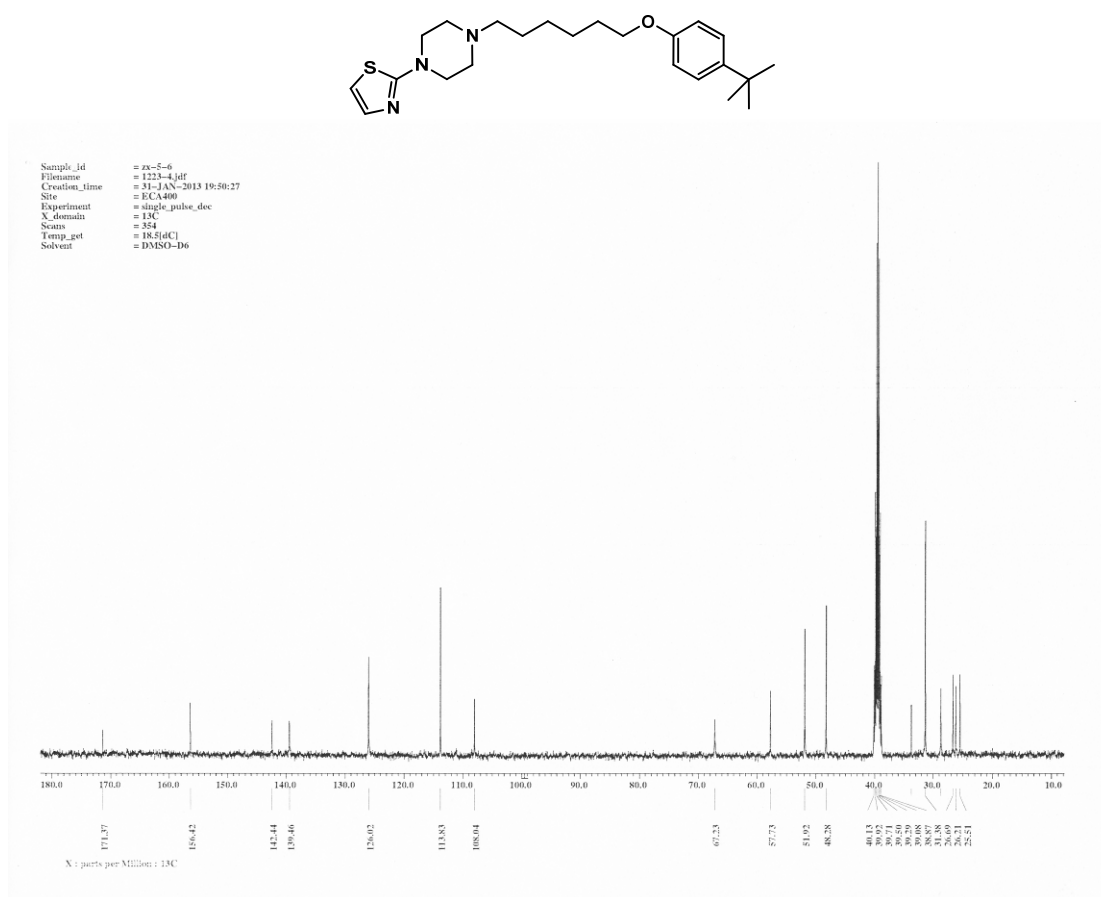**Figure S18.** The ESI-HRMS of compound **8f**.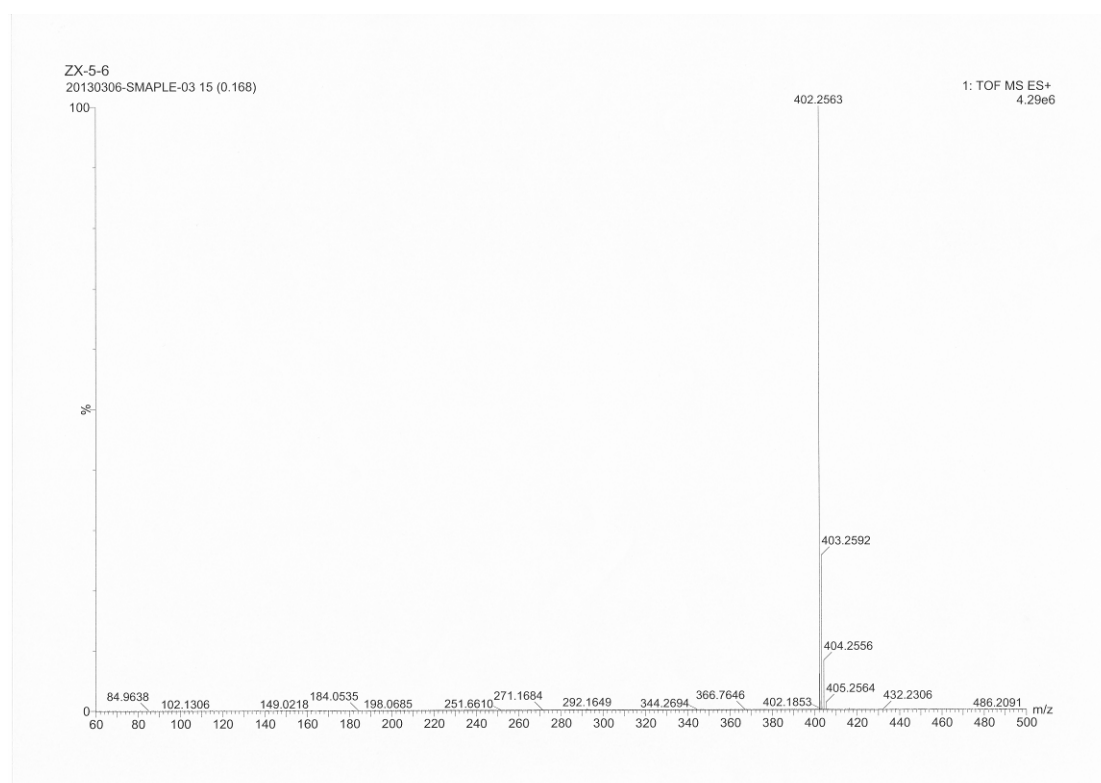

Supplement: s1 [file s1]
